Osborn *et al.* imply. The *LMA-S*<sup>TM</sup> should not be confused with the *LMA-P*<sup>TM</sup>. It is not a single-use *LMA-P*<sup>TM</sup> because substantial details are designed and constructed in a different way to overcome weaknesses of other *LMAs*<sup>TM</sup>, as the producers of the *LMA-S*<sup>TM</sup> promote their device. The *LMA-S*<sup>TM</sup>'s clinical performance can only be evaluated in clinical trials. First published comparisons with a reasonable sample size between the *LMA-P*<sup>TM</sup> and *LMA-S*<sup>TM</sup><sup>5</sup> showed clinically important differences in the seal pressure between both devices.

We affirm our statement that acute airway obstruction of *LMAs*<sup>TM</sup> can occur at any time, and backup strategies for the failure of the backup device *LMA*<sup>TM</sup> have to be considered.

**Lorenz G. Theiler, M.D.,\* Maren Kleine-Brueggemeyer, M.D., Robert Greif, M.D., M.M.E.** \*University Hospital Bern, Bern, Switzerland. lorenz.theiler@insel.ch

## References

1. Stix MS, O'Connor CJ Jr, Valade DR: The ProSeal LMA does not cause laryngeal edema. *Can J Anaesth* 2006; 53:961-3
2. Kleine-Brueggemeyer M, Theiler LG, Luyet C, Greif R: Acute airway obstruction caused by the new single use Laryngeal Mask Airway Supreme. *ANESTHESIOLOGY* 2009; 110:189-90
3. Stix MS, O'Connor CJ Jr: Depth of insertion of the ProSeal laryngeal mask airway. *Br J Anaesth* 2003; 90:235-7.
4. Brimacombe J, Clarke G, Keller C: Lingual nerve injury associated with the ProSeal laryngeal mask airway: A case report and review of the literature. *Br J Anaesth* 2005; 95:420-3
5. Eschertzhuber S, Brimacombe J, Hohlrieder M, Keller C: The laryngeal mask airway Supreme - a single use laryngeal mask airway with an oesophageal vent. A randomised, cross-over study with the laryngeal mask airway ProSeal in paralysed, anaesthetised patients. *Anaesthesia* 2009; 64:79-83

(Accepted for publication April 23, 2009.)

Anesthesiology 2009; 111:453

Copyright © 2009, the American Society of Anesthesiologists, Inc. Lippincott Williams & Wilkins, Inc.

## Hypothermia Should Also Have Been Considered to Be a Predictor of Adverse Perioperative Cardiac Events

*To the Editor:*—I read with interest the article by Kheterpal *et al.*<sup>1</sup> However, I am concerned that they did not control for hypothermia in their analysis. Hypothermia is considered to be a risk factor for morbid cardiac events.<sup>2,3</sup> Without controlling for this variable, the risk assigned to their nine variables may be different than what was reported. For example, suppose the elderly patients became hypothermic more readily than the nonelderly patients. If this was the case, then the risk factor of being elderly may be overestimated, as it could have been the hypothermia and not the age that caused the problem in the elderly patient. I suspect that accurate core temperatures were not measured in most, if not all, patients who did not receive general anesthesia. However, the study population seems large enough to allow for a separate analysis of patients who did have their core temperature recorded. Do the authors have any temperature analysis that was not reported in the article?

**Jonathan V. Roth, M.D.,** Albert Einstein Medical Center, Philadelphia, Pennsylvania. rothj@einstein.edu

## References

1. Kheterpal S, O'Reilly M, Englesbe MJ, Rosenberg AL, Shanks AM, Zhang L, Rothman ED, Campbell DA, Tremper KK: Preoperative and intraoperative predictors of cardiac adverse events after general, vascular, and urological surgery. *ANESTHESIOLOGY* 2009; 110:58-66
2. Sessler DI: Temperature monitoring and perioperative thermoregulation. *ANESTHESIOLOGY* 2008; 109:318-38
3. Frank SM, Fleisher LA, Breslow MJ, Higgins MS, Olson KF, Kelly S, Beattie C: Perioperative maintenance of normothermia reduces the incidence of morbid cardiac events: A randomized clinical trial. *JAMA* 1997; 277:1127-34

(Accepted for publication April 27, 2009.)

Anesthesiology 2009; 111:453-4

Copyright © 2009, the American Society of Anesthesiologists, Inc. Lippincott Williams & Wilkins, Inc.

*In Reply:*—We thank Dr. Roth for his interest in our article and insightful commentary. Previous literature has demonstrated an association between intraoperative hypothermia and cardiac adverse events. However, we did not evaluate this clinical element in our analysis for several reasons. First, previous data regarding hypothermia and cardiac adverse events is limited to high-risk patients who had a preexisting diagnosis of coronary artery disease or several known risk factors for coronary artery disease undergoing high-risk thoracic, intraperitoneal, or vascular procedures.<sup>1</sup> Although our dataset included some high-risk patients, only 9.6% had a previous cardiac intervention and only 22% were undergoing high-risk surgery.<sup>2</sup> As a result, the studied population was dissimilar to previous work, and we were skeptical of being able to identify an association between hypothermia and cardiac adverse events in this more representative population. Second, although our studied dataset was large, we were only able to observe 83 events. As a result, we had to limit the number of independent variables evaluated in

the logistic regression full-model fit to reduce the impact of model overfitting.<sup>3</sup> Hypothermia was one of several independent variables that we were unable to assess because of this statistical analysis constraint.

Finally, the absence of a consistent way to separate "hypothermic" versus "normothermic" groups in an observational dataset presented the final challenge. There are several ways to define hypothermia. First, we could evaluate median temperatures within 10-min epochs, similar to the presented hypotension analysis. Second, some may advocate that a single temperature measurement below 36°C would qualify as "hypothermic." Third, others may suggest that we employ the absence of active warming to be consistent with prospective, controlled studies.

We agree that intraoperative hypothermia should be evaluated in future studies. We look forward to conducting large, multicenter observational dataset analyses that may offer us the statistical power necessary to do so.

Anesthesiology, V 111, No 2, Aug 2009

Sachin Kheterpal, M.D., M.B.A.,\* Kevin K. Tremper, Ph.D., M.D. \*University of Michigan Medical School, Ann Arbor, Michigan. sachinkh@med.umich.edu

## References

1. Frank SM, Fleisher LA, Breslow MJ, Higgins MS, Olson KF, Kelly S, Beattie C: Perioperative maintenance of normothermia reduces the incidence of morbid cardiac events: A randomized clinical trial. *JAMA* 1997; 277:1127-34

2. Kheterpal S, O'Reilly M, Englesbe MJ, Rosenberg AL, Shanks AM, Zhang L, Rothman ED, Campbell DA, Tremper KK: Preoperative and intraoperative predictors of cardiac adverse events after general, vascular, and urological surgery. *ANESTHESIOLOGY* 2009; 110:58-66

3. Harrell FE Jr, Lee KL, Matchar DB, Reichert TA: Regression models for prognostic prediction: Advantages, problems, and suggested solutions. *Cancer Treat Rep* 1985; 69:1071-7

(Accepted for publication April 27, 2009.)

Anesthesiology 2009; 111:454-5

Copyright © 2009, the American Society of Anesthesiologists, Inc. Lippincott Williams & Wilkins, Inc.

## Retropharyngeal Carotid Artery: An Important Anatomic Variation for the Anesthesiologist

**To the Editor:**—Recently, a patient was discovered to have a markedly aberrant right carotid artery. A subsequent informal survey of our colleagues revealed that many anesthesia providers are unaware of the origins and incidence of this anatomical variant, and do not routinely assess patients for a symptomatic or clinically silent finding.

Our patient was a 73-yr-old male with a history of hypertension, diabetes mellitus, and obstructive sleep apnea requiring the use of continuous positive airway pressure at night, who was seen in our anesthesia preoperative clinic. He was scheduled for wide local excision and partial left auriclectomy, sentinel lymph node biopsy, and possible parotidectomy and left neck dissection because of recurrent lentigo malignant melanoma of the left ear. He had few subjective complaints, with the notable exception of difficulty swallowing both liquids and solids and intermittent episodes of choking. The airway exam revealed a Mallampati III status. No pulsatile mass was seen, but the patient had notable and asymmetric fullness to his right posterior and lateral pharyngeal wall.

Because of the planned procedure, there was a fortuitous opportunity to review computed tomographic studies of the head and neck (fig. 1). A markedly retropharyngeal course of the right carotid artery causing ventral and medial displacement of the tissues of the palate was noted.

The internal carotid arteries have their embryonic origination in the third aortic arch and the dorsal aorta. During normal embryonic development, the dorsal aortic root descends into the chest during the eighth week of fetal life, which lengthens and straightens the course of the carotid artery. It has been suggested that incomplete straightening and persistence of the embryonic angulation can result in the presence of aberrant carotid arteries in the retropharyngeal space.<sup>1</sup> A variety of anatomic presentations are possible, which tend to become more pronounced with the physiologic effects of aging. These include simple medial displacement of the artery, as well as kinking and outright coiling of the vessel. In older patients, the incidence has been estimated to be as high as 2%. This corresponds to our experience, as we have been confronted with a midline or retropharyngeal carotid artery three times in several hundred dissections of the head and neck for cancer.

Although there are several reviews of the retropharyngeal carotid artery in both the radiology and laryngology/head and neck literature going back to the 1920s<sup>2-6</sup>, we could find no information on the subject in the anesthesia literature, which perhaps explains the lack of awareness on the part of our colleagues. This is unfortunate, as a retropharyngeal carotid artery has a number of clinically relevant implications for the anesthesiologist as well as the surgeon.

First, rupture of the oropharyngeal mucosa as well as lacerations to the submucosal soft tissue as a complication of tracheal intubation is

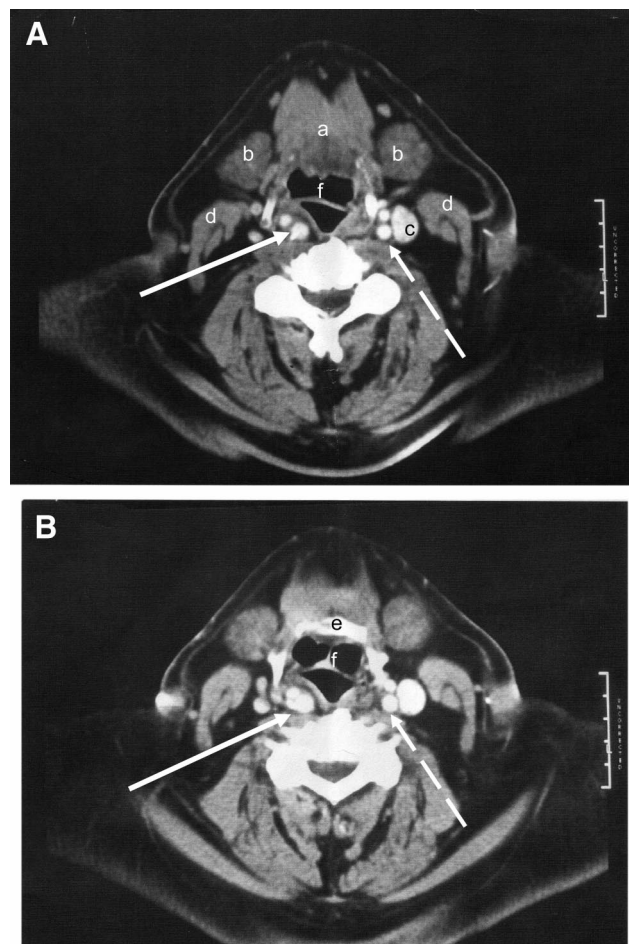

**Fig. 1.** Axial computed tomography scans with contrast at the level of (A) the base of the tongue and (B) the vallecula. At the level of the base of tongue the carotid artery (white solid arrow) has bifurcated into the internal and external branches. The internal carotid artery is the larger of the two branches. At the level of the vallecula, the two branches are seen just superior to the bifurcation (white solid arrow). Additional structures seen include the tongue (a), the submandibular glands (b), the left internal jugular vein (c), the sternocleidomastoid muscles (d), the hyoid bone (e), the epiglottis (f), and the normal left carotid arteries (white dashed arrow). These images are superior to the level of the trachea and esophagus.

Support was provided solely from institutional and/or departmental sources.
